# Supplementary material
Source: PubMed Central journal article supplement (PMC3340193)
Supplement: supp_M111.304857_jbc.M111.304857-1.pdf [file supp_M111.304857_jbc.M111.304857-1.pdf]

**Table 1a**

### Gene Function Enrichment Analysis

\*\*\*Pathway\*\*\*

| Term Name                              | P-value  |
|----------------------------------------|----------|
| Cell_Cycle_KEGG // GenMAPP             |          |
| DNA_replication_Reactome // GenMAPP    | <0.00001 |
| G1_to_S_cell_cycle_Reactome // GenMAPP |          |

3 reported significant, 0 expected false positive

83 terms assessed for enrichment at p-value 0.001

---
