# Supplementary material
Source: PubMed Central journal article supplement (PMC3340193)
Supplement: supp_M111.304857_jbc.M111.304857-2.pdf [file supp_M111.304857_jbc.M111.304857-2.pdf]

**Table 1b**

| Pathway 'Cell_Cycle_KEGG // GenMAPP' 49 genes in 457 annotated genes (genome-wide: 86/2254, p-value: 0.000000) |                                                                                |           |                 |              |
|----------------------------------------------------------------------------------------------------------------|--------------------------------------------------------------------------------|-----------|-----------------|--------------|
| probe set                                                                                                      | gene                                                                           | Accession | EntrezGene      | fold change  |
| 1421679_a_at                                                                                                   | cyclin-dependent kinase inhibitor 1A (P21)                                     | NM_007669 | 12575           | <b>15.66</b> |
| 1415743_at                                                                                                     | histone deacetylase 5                                                          | NM_010412 | 15184           | 3.3          |
| 1417890_at                                                                                                     | retinoblastoma 1                                                               | NM_009029 | 19645           | <b>3.17</b>  |
| 1448835_at                                                                                                     | E2F transcription factor 6                                                     | NM_033270 | 50496           | 2.31         |
| 1423605_a_at                                                                                                   | transformed mouse 3T3 cell double minute 2                                     | AJ004719  | 17246           | 2.26         |
| 1449519_at                                                                                                     | growth arrest and DNA-damage-inducible 45 alpha                                | NM_007836 | 31917           | <b>2.23</b>  |
| 1450920_at                                                                                                     | cyclin B2                                                                      | AK013312  | 12442           | 2.32         |
| 1460348_at                                                                                                     | MAD2 mitotic arrest deficient-like 2 (yeast)                                   | BC011282  | 71890           | 2.33         |
| 1426538_a_at                                                                                                   | transformation related protein 53                                              | BB828014  | 22059           | 2.36         |
| 1448314_at                                                                                                     | cell division cycle 2 homolog A (S. pombe)                                     | NM_007659 | 12534           | 2.36         |
| 1417444_at                                                                                                     | E2F transcription factor 5                                                     | BC003220  | 13659           | 2.96         |
| 1417947_at                                                                                                     | proliferating cell nuclear antigen                                             | BC010343  | 10638           | 2.97         |
| 1418481_at                                                                                                     | protein kinase, membrane associated tyrosine/threonine 1                       | NM_023058 | 26930           | 3.09         |
| 1435339_at                                                                                                     | cyclin-dependent kinase 6                                                      | BM238926  | 12571           | 3.27         |
| 1422747_at                                                                                                     | CHK-2 checkpoint homolog (S. pombe)                                            | NM_016681 | 50983           | 3.12         |
| 1420653_at                                                                                                     | transforming growth factor, beta 1                                             | NM_011577 | 21803           | 3.13         |
| 1418226_at                                                                                                     | origin recognition complex, subunit 2-like (S. cerevisiae)                     | BB830976  | 18393           | <b>3.14</b>  |
| 1416773_at                                                                                                     | wee 1 homolog (S. pombe)                                                       | NM_009516 | 22390           | <b>3.46</b>  |
| 1459918_at                                                                                                     | budding uninhibited by benzimidazoles 3 homolog (S. cerevisiae)                | BB644880  | 12237           | <b>3.51</b>  |
| 1416492_at                                                                                                     | cyclin E1                                                                      | NM_007633 | 12447           | <b>3.75</b>  |
| 1416214_at                                                                                                     | minichromosome maintenance deficient 4 homolog (S. cerevisiae)                 | BC013094  | 17217           | <b>3.83</b>  |
| 1417131_at                                                                                                     | cell division cycle 25 homolog A (S. cerevisiae)                               | C76119    | 12530           | 3.86         |
| 1424156_at                                                                                                     | retinoblastoma-like 1 (p107)                                                   | U27177    | 19650           | <b>3.98</b>  |
| 1419943_a_at                                                                                                   | cyclin B1                                                                      | AJ015121  | 26897           | <b>4.05</b>  |
| 1416251_at                                                                                                     | minichromosome maintenance deficient 6 (S. cerevisiae)                         | NM_005657 | 17219           | 4.29         |
| 1426002_a_at                                                                                                   | cell division cycle 7 (S. cerevisiae)                                          | AB019574  | 12545           | <b>4.46</b>  |
| 1417910_at                                                                                                     | cyclin A2                                                                      | S75483    | 12428           | 4.62         |
| 1448191_at                                                                                                     | polo-like kinase 1 (Drosophila)                                                | NM_011121 | 18817           | <b>4.86</b>  |
| 1434079_s_at                                                                                                   | minichromosome maintenance deficient 2 mitofin (S. cerevisiae)                 | BB699415  | 17216           | <b>4.97</b>  |
| 1416076_at                                                                                                     | cyclin B11                                                                     | NM_007629 | 12429 // 268897 | <b>5.28</b>  |
| 1416664_at                                                                                                     | cell division cycle 20 homolog (S. cerevisiae)                                 | NM_023223 | 107995          | 5.36         |
| 1417037_at                                                                                                     | origin recognition complex, subunit 6-like (S. cerevisiae)                     | NM_019716 | 56452           | 5.36         |
| 1416961_at                                                                                                     | budding uninhibited by benzimidazoles 1 homolog, beta (S. cerevisiae)          | NM_009773 | 12236           | 5.43         |
| 1418969_at                                                                                                     | S-phase kinase-associated protein 2 (p45)                                      | AV259620  | 27401           | 5.64         |
| 1421963_a_at                                                                                                   | cell division cycle 25 homolog B (S. cerevisiae)                               | NM_023117 | 12531           | 5.66         |
| 1411920_at                                                                                                     | pituitary tumor-transforming 1                                                 | NM_013917 | 30309           | 6.02         |
| 1450677_at                                                                                                     | checkpoint kinase 1 homolog (S. pombe)                                         | NM_007691 | 12649           | 6.23         |
| 1422535_at                                                                                                     | cyclin E2                                                                      | AF091432  | 12448           | 6.51         |
| 1422663_at                                                                                                     | origin recognition complex, subunit 1-like (S. cerevisiae)                     | BC015073  | 18392           | 6.57         |
| 1424046_at                                                                                                     | budding uninhibited by benzimidazoles 1 homolog (S. cerevisiae)                | AF002823  | 12235           | 6.68         |
| 1422252_a_at                                                                                                   | cell division cycle 25 homolog C (S. cerevisiae)                               | NM_009800 | 12532           | 6.78         |
| 1416030_a_at                                                                                                   | minichromosome maintenance deficient 7 (S. cerevisiae)                         | NM_008568 | 17220           | 6.86         |
| 1416575_at                                                                                                     | cell division cycle 45 homolog (S. cerevisiae)-like                            | NM_009862 | 12544           | 7.23         |
| 1422460_at                                                                                                     | MAD2 (mitotic arrest deficient, homolog)-like 1 (yeast)                        | NM_019499 | 56150           | 7.24         |
| 1415945_at                                                                                                     | minichromosome maintenance deficient 5, cell division cycle 46 (S. cerevisiae) | NM_008566 | 17218           | 7.79         |
| 1418334_at                                                                                                     | expressed sequence A4545217                                                    | NM_013726 | 27214           | 8.14         |
| 1420026_s_at                                                                                                   | minichromosome maintenance deficient 3 (S. cerevisiae)                         | CB0350    | 17215           | 9.74         |
| 1433862_at                                                                                                     | extra spindle poles-like 1 (S. cerevisiae)                                     | BM005078  | 105988          | -12.38       |
| 1417019_a_at                                                                                                   | cell division cycle 6 homolog (S. cerevisiae)                                  | NM_011799 | 23834           | -12.5        |
