# Supplementary material
Source: PubMed Central journal article supplement (PMC3340193)
Supplement: supp_M111.304857_jbc.M111.304857-3.pdf [file supp_M111.304857_jbc.M111.304857-3.pdf]

# Table 1c

| Pathway DNA_replication_Reactome // GenMAPP <sup>3</sup> 34 genes in 457 annotated genes (genome-wide: 42,2254, p-value: 0.000000) |                                                                                 |           |            |             |
|------------------------------------------------------------------------------------------------------------------------------------|---------------------------------------------------------------------------------|-----------|------------|-------------|
| probe set                                                                                                                          | gene                                                                            | Accession | EntrezGene | fold change |
| 1451920_a_at                                                                                                                       | replication factor C 1                                                          | M88489    | 19687      | -2.16       |
| 1448938_at                                                                                                                         | replication protein A3                                                          | NM_026632 | 68240      | -2.38       |
| 1426838_at                                                                                                                         | polymerase (DNA-directed), delta 3, accessory subunit                           | AI-010805 | 67967      | -2.85       |
| 1417947_at                                                                                                                         | proliferating cell nuclear antigen                                              | BC010343  | 18538      | -2.97       |
| 1423293_at                                                                                                                         | replication protein A1                                                          | BM244983  | 68275      | -3          |
| 1418226_at                                                                                                                         | origin recognition complex, subunit 2-like (S. cerevisiae)                      | BB830976  | 18393      | -3.14       |
| 1427094_at                                                                                                                         | polymerase (DNA directed), epsilon 2 (p59 subunit)                              | AF036698  | 18974      | -3.47       |
| 1418369_at                                                                                                                         | DNA primase, p49 subunit                                                        | J04620    | 19075      | -3.72       |
| 1417933_at                                                                                                                         | replication factor C (activator 1) 2                                            | NM_020022 | 19718      | -3.73       |
| 1416214_at                                                                                                                         | minichromosome maintenance deficient 4 homolog (S. cerevisiae)                  | BC013024  | 17217      | -3.83       |
| 1418035_a_at                                                                                                                       | DNA primase, p59 subunit                                                        | NM_008922 | 19076      | -3.89       |
| 1448369_at                                                                                                                         | polymerase (DNA directed), alpha 2                                              | NM_008893 | 18969      | -4.18       |
| 1448277_at                                                                                                                         | polymerase (DNA directed), delta 2, regulatory subunit                          | NM_008994 | 18972      | -4.32       |
| 1416251_at                                                                                                                         | minichromosome maintenance deficient 6 (MIS6 homolog, S. pombe) (S. cerevisiae) | NM_008567 | 17219      | -4.39       |
| 1426002_a_at                                                                                                                       | cell division cycle 7 (S. cerevisiae)                                           | AB018574  | 12545      | -4.46       |
| 1434079_s_at                                                                                                                       | minichromosome maintenance deficient 2 mitotin (S. cerevisiae)                  | BB699415  | 17216      | -4.97       |
| 1417037_at                                                                                                                         | origin recognition complex, subunit 6-like (S. cerevisiae)                      | NM_019716 | 56452      | -5.36       |
| 1448187_at                                                                                                                         | polymerase (DNA directed), delta 1, catalytic subunit                           | BC009126  | 18971      | -5.56       |
| 1433406_a_at                                                                                                                       | minichromosome maintenance deficient 10 (S. cerevisiae)                         | AI-010648 | 70024      | -5.71       |
| 1416433_at                                                                                                                         | replication protein A2                                                          | BC004678  | 18991      | -5.73       |
| 1424321_at                                                                                                                         | replication factor C (activator 1) 4                                            | BC003336  | 106344     | -6          |
| 1419397_at                                                                                                                         | polymerase (DNA directed), alpha 1                                              | NM_008892 | 18968      | -6.22       |
| 1422663_at                                                                                                                         | origin recognition complex, subunit 1-like (S. cerevisiae)                      | BC015073  | 18392      | -6.57       |
| 1416030_a_at                                                                                                                       | minichromosome maintenance deficient 7 (S. cerevisiae)                          | NM_008568 | 17220      | -6.86       |
| 1452917_at                                                                                                                         | replication factor C (activator 1) 5                                            | AI-011489 | 72151      | -7.07       |
| 1423700_at                                                                                                                         | replication factor C (activator 1) 3                                            | BC026796  | 68263      | -7.12       |
| 1416675_at                                                                                                                         | cell division cycle 45 homolog (S. cerevisiae)-like                             | NM_009862 | 12544      | -7.23       |
| 1415945_at                                                                                                                         | minichromosome maintenance deficient 5, cell division cycle 46 (S. cerevisiae)  | NM_008566 | 17218      | -7.79       |
| 1418334_at                                                                                                                         | expressed sequence AA545217                                                     | NM_013726 | 27214      | -8.14       |
| 1420026_s_at                                                                                                                       | minichromosome maintenance deficient 3 (S. cerevisiae)                          | CB0360    | 17216      | -9.74       |
| 1446950_a_at                                                                                                                       | polymerase (DNA directed), epsilon                                              | NM_011132 | 18973      | -9.89       |
| 1424143_a_at                                                                                                                       | retroviral integration site 2                                                   | AF47481   | 67177      | -9.96       |
| 1417506_at                                                                                                                         | geminin                                                                         | NM_020567 | 57441      | -11.43      |
| 1417019_a_at                                                                                                                       | cell division cycle 6 homolog (S. cerevisiae)                                   | NM_011799 | 28834      | -12.5       |
