# Supplementary material
Source: PubMed Central journal article supplement (PMC3340193)
Supplement: supp_M111.304857_jbc.M111.304857-4.pdf [file supp_M111.304857_jbc.M111.304857-4.pdf]

# Table 1d

| Pathway 'G1_to_S_cell_cycle_Reactome // GenMAPP' 39 genes in 457 annotated genes (genome-wide: 712254, p-value: 0.00000) |                                                                                 |           |                        |
|--------------------------------------------------------------------------------------------------------------------------|---------------------------------------------------------------------------------|-----------|------------------------|
| probe set                                                                                                                | gene                                                                            | Accession | EntrezGene fold change |
| 1421679_a_at                                                                                                             | cyclin-dependent kinase inhibitor 1A (P21)                                      | NM_007669 | 12575 15.66            |
| 1419979_s_at                                                                                                             | cAMP responsive element binding protein 3                                       | AU044960  | 12913 3.65             |
| 1417050_at                                                                                                               | retinoblastoma 1                                                                | NM_009029 | 19645 3.17             |
| 1449152_at                                                                                                               | cyclin-dependent kinase inhibitor 2B (p15, inhibits CDK4)                       | AF059567  | 12579 2.5              |
| 1448836_at                                                                                                               | E2F transcription factor 6                                                      | NM_033270 | 50496 2.31             |
| 1423605_a_at                                                                                                             | transformed mouse 3T3 cell double minute 2                                      | AJ-004719 | 17246 2.26             |
| 1449619_at                                                                                                               | growth arrest and DNA-damage-inducible 45 alpha                                 | NM_007636 | 13197 2.23             |
| 1427174_at                                                                                                               | transcription factor Dip 2                                                      | BB406735  | 211586 2.31            |
| 1426538_a_at                                                                                                             | transformation related protein 53                                               | BB982014  | 22059 2.36             |
| 1448314_at                                                                                                               | cell division cycle 2 homolog A (S. pombe)                                      | NM_007669 | 12534 2.36             |
| 1448938_at                                                                                                               | replication protein A3                                                          | NM_026632 | 68240 2.38             |
| 1417444_at                                                                                                               | E2F transcription factor 5                                                      | BC003220  | 13559 2.96             |
| 1417947_at                                                                                                               | proliferating cell nuclear antigen                                              | BC010343  | 18538 2.97             |
| 1418481_at                                                                                                               | protein kinase, membrane associated tyrosine/threonine 1                        | NM_023058 | 268930 2.97            |
| 1423293_at                                                                                                               | replication protein A1                                                          | BM244983  | 68275 3                |
| 1435338_at                                                                                                               | cyclin-dependent kinase 6                                                       | BM238926  | 12571 3.09             |
| 1418226_at                                                                                                               | origin recognition complex, subunit 2-like (S. cerevisiae)                      | BB630976  | 18393 3.14             |
| 1415773_at                                                                                                               | wee 1 homolog (S. pombe)                                                        | NM_009616 | 22390 3.46             |
| 1427094_at                                                                                                               | polymerase (DNA directed), epsilon 2 (p59 subunit)                              | AF076689  | 18974 3.47             |
| 1418369_at                                                                                                               | DNA primase, p49 subunit                                                        | JD4620    | 19075 3.72             |
| 1416492_at                                                                                                               | cyclin E1                                                                       | NM_007633 | 12447 3.75             |
| 1416214_at                                                                                                               | minichromosome maintenance deficient 4 homolog (S. cerevisiae)                  | BC013094  | 17217 3.83             |
| 1417131_at                                                                                                               | cell division cycle 25 homolog A (S. cerevisiae)                                | C76119    | 12530 3.86             |
| 1418036_a_at                                                                                                             | DNA primase, p58 subunit                                                        | NM_008922 | 19076 3.89             |
| 1424156_at                                                                                                               | retinoblastoma-like 1 (p107)                                                    | U27177    | 19650 3.98             |
| 1419943_s_at                                                                                                             | cyclin B1                                                                       | AU015121  | 256997 4.05            |
| 1448369_at                                                                                                               | polymerase (DNA directed), alpha 2                                              | NM_008893 | 18969 4.18             |
| 1416251_at                                                                                                               | minichromosome maintenance deficient 5 (MIS5 homolog, S. pombe) (S. cerevisiae) | NM_008567 | 17219 4.39             |
| 1424079_s_at                                                                                                             | minichromosome maintenance deficient 2 mitotin (S. cerevisiae)                  | BB693415  | 17216 4.87             |
| 1416076_at                                                                                                               | cyclin B1                                                                       | NM_007629 | 12429 /// 268697 5.28  |
| 1417037_at                                                                                                               | origin recognition complex, subunit 6-like (S. cerevisiae)                      | NM_019176 | 56452 5.36             |
| 1416433_at                                                                                                               | replication protein A2                                                          | BC004578  | 19891 5.73             |
| 1422536_at                                                                                                               | cyclin E2                                                                       | AF091432  | 12448 6.51             |
| 1422663_at                                                                                                               | origin recognition complex, subunit 1-like (S. cerevisiae)                      | BC015073  | 18392 6.57             |
| 1416030_a_at                                                                                                             | minichromosome maintenance deficient 7 (S. cerevisiae)                          | NM_008568 | 17220 6.86             |
| 1416575_at                                                                                                               | cell division cycle 45 homolog (S. cerevisiae)-like                             | NM_009862 | 12544 7.23             |
| 1415945_at                                                                                                               | minichromosome maintenance deficient 5, cell division cycle 46 (S. cerevisiae)  | NM_009566 | 17218 7.79             |
| 1420026_s_at                                                                                                             | minichromosome maintenance deficient 3 (S. cerevisiae)                          | CC0350    | 17215 9.74             |
| 1448650_a_at                                                                                                             | polymerase (DNA directed), epsilon                                              | NM_011132 | 18973 9.89             |
