# Supplementary material
Source: PubMed Central journal article supplement (PMC3340193)
Supplement: supp_M111.304857_jbc.M111.304857-5.pdf [file supp_M111.304857_jbc.M111.304857-5.pdf]

## Table2

### Top Bio Functions

#### **Molecular and Cellular Functions**

Name

---

Cell Cycle

Cellular Assembly and Organization

DNA Replication, Recombination, and Repair

Cell Death

Cellular Growth and Proliferation

#### **Physiological System Development and Function**

Name

---

Connective Tissue Development and Function

Organismal Development

Tissue Morphology

Tissue Development

Skeletal and Muscular System Development and Function

---
